# Supplementary material for: Ecological Adaption Analysis of the Cotton Aphid (Aphis gossypii) in Different Phenotypes by Transcriptome Comparison
Source: PLoS One. 2013 Dec 23;8(12):e83180. doi: 10.1371/journal.pone.0083180 (PMC3871566; doi:10.1371/journal.pone.0083180)
Supplement: Table S2 — The BLASTX results and digital gene expression profiles of candidate cotton aphid Hsps and P450s. Information includes gene ID in this transcriptome, open reading frame length, gene name, accession number, species, E-value, identity to other proteins, FPKM, and FPKM fold-change. (XLSX) [file pone.0083180.s004.xlsx]

## Sheet: Sheet1
Table S2. The BLASTX results and gene express profile of candidate Hsps and P450.
GeneID	ORF	Best Blastp Match					FPKM		Fold change of FPKM
	(bp)	Name	Acc.number	Species	E-value	Identity	MorphII	MorphI	log2(MorphI/MorphII)	up/down
Heat shock protein (Hsp)
CL1438.Contig2	1804	heat shock protein 70 B2-like	XP_001949837	Acyrthosiphon pisum	0	0.97	19.2954	5.9846	-1.6889	Down
CL1736.Contig1	1953	heat shock protein 83-like	XP_001943172	Acyrthosiphon pisum	0	0.99	83.7919	322.851	1.946	Up
CL1736.Contig2	2154	heat shock protein 90	ABV55506	Microplitis mediator	0	0.82	592.834	637.388	0.1045	Up
CL1854.Contig1	1962	heat shock protein 70	AFO70211	Aphis glycines	0	0.99	933.679	354.657	-1.3965	Down
CL1854.Contig3	1962	heat shock cognate 70	NP_001166228	Nasonia vitripennis	0	0.94	108.9	1032.26	3.2447	Up
CL1978.Contig1	612	small heat shock protein	AEH05930	Apis cerana cerana	1e-81	0.64	0.1694	1163.85	12.7462	Up
CL2504.Contig1	816	activator of heat shock 90kDa protein ATPase-like	NP_001155868	Acyrthosiphon pisum	0	0.92	68.2673	53.9255	-0.3402	Down
CL2603.Contig1	186	small heat shock protein	AAV48822	Venturia canescens	3e-20	0.87	0	82.5024	16.3321	Up
CL2817.Contig3	2358	heat shock 70 kDa protein 4L-like	XP_001951792	Acyrthosiphon pisum	0	0.94	62.2664	31.5591	-0.9804	Down
CL3029.Contig1	1692	60 kDa heat shock protein, mitochondrial-like isoform 2	XP_003241704	Acyrthosiphon pisum	0	0.93	72.1642	31.1364	-1.2127	Down
CL3320.Contig2	1323	DnaJ-like	NP_001119620	Acyrthosiphon pisum	2e-152	0.95	268.749	201.413	-0.4161	Down
CL3343.Contig1	300	small heat shock protein	AAV48822	Venturia canescens	5e-28	0.65	0.1174	299.819	11.3184	Up
CL363.Contig1	594	heat shock protein 40	AEJ88366	Bactrocera dorsalis	2e-08	0.39	4.4388	3.5559	-0.32	Down
CL4130.Contig1	594	heat shock protein 1	EHJ68903	Danaus plexippus	4e-63	0.54	133.387	29.439	-2.1798	Down
CL4328.Contig1	888	dnaJ protein homolog 1-like isoform 1	XP_001949061	Acyrthosiphon pisum	0	0.96	28.267	35.5094	0.3291	Up
CL5221.Contig1	1866	heat shock protein cognate 5	NP_001153520	Apis mellifera	0	0.76	185.867	79.3173	-1.2286	Down
CL566.Contig2	612	21.5 kDa heat shock protein	AFX84563	Lygus hesperus	7e-98	0.76	46.4522	9.2492	-2.3283	Down
CL5740.Contig1	1584	heat shock 70 kDa protein 14-like	XP_001945768	Acyrthosiphon pisum	0	0.95	41.9884	28.139	-0.5774	Down
CL5767.Contig1	1319	heat shock protein 70 HSP70 interacting protein	XP_002427295	Pediculus humanus corporis	4e-41	0.37	7.2896	4.9755	-0.551	Down
CL5943.Contig1	594	putative heat shock protein 70-interacting protein	EHJ64169	Danaus plexippus	1e-62	0.55	0	11.2893	13.4627	Up
CL6327.Contig1	306	heat shock 10kDa protein 1	NP_001119666	Acyrthosiphon pisum	2e-61	0.94	180.999	96.6358	-0.9054	Down
CL7120.Contig1	1341	heat shock protein 70 (hsp70)-interacting protein	XP_001661211	Aedes aegypti	1e-138	0.48	13.166	3.9097	-1.7517	Down
CL7882.Contig1	1050	heat shock protein 68-like, partial	XP_003248918	Acyrthosiphon pisum	0	0.95	20.3164	53.139	1.3871	Up
CL7882.Contig2	1143	heat shock protein 70 A1-like	XP_001945786	Acyrthosiphon pisum	0	0.96	6.5809	21.3563	1.6983	Up
CL7882.Contig8	1740	heat shock protein 70 B2-like	XP_001951915	Acyrthosiphon pisum	0	0.95	19.3327	27.3502	0.5005	Up
CL7897.Contig2	777	heat shock protein 60	ACO57619	Pteromalus puparum	7e-162	0.94	65.0347	135.193	1.0557	Up
CL859.Contig2	1926	heat shock protein cognate 3 precursor	NP_001156420	Acyrthosiphon pisum	0	0.99	286.366	98.1315	-1.5451	Down
CL966.Contig1	2052	heat shock protein 75 kDa, mitochondrial-like	XP_001948190	Acyrthosiphon pisum	0	0.93	35.618	10.6851	-1.737	Down
Ut10036	639	heat shock 90/70 organizing protein	AFV50602	Frankliniella occidentalis	2e-56	0.5	56.0579	53.5168	-0.0669	Down
Ut12560	1626	Hsp60 protein, putative	XP_002429123	Pediculus humanus corporis	0	0.82	49.8856	29.5822	-0.7539	Down
Ut138	1749	dnaJ homolog subfamily C member 21-like	XP_001943330	Acyrthosiphon pisum	0	0.9	51.0328	12.7526	-2.0006	Down
Ut14240	354	heat shock protein 67B2-like	XP_001949032	Acyrthosiphon pisum	2e-69	0.86	5.4255	0.8061	-2.7507	Down
Ut14667	213	heat shock protein 70	CAA23496	Drosophila melanogaster	0.51	0.4	9.5321	29.1673	1.6135	Up
Ut1647	1719	heat shock protein 70 (hsp70)-interacting protein	XP_001652005	Aedes aegypti	2e-109	0.35	37.8275	15.3471	-1.3015	Down
Ut17311	324	heat shock protein 70 HSP70, putative	XP_002430247	Pediculus humanus corporis	2e-16	0.42	2.4451	0.8092	-1.5953	Down
Ut17685	156	DnaJ-like protein subfamily B member 13	EGI60090	Acromyrmex echinatior	2e-10	0.5	0	2.6638	11.3793	Up
Ut20698	1440	heat shock 70 kDa protein cognate 5-like	XP_003393349	Bombus terrestris	0	0.82	0.0357	96.0063	11.393	Up
Ut20769	153	heat shock protein 90 cognate	ADK55517	Spodoptera litura	3e-14	0.61	0	11.7113	13.5156	Up
Ut20815	465	small heat shock protein	AEH05930	Apis cerana cerana	2e-35	0.49	0.0865	136.28	10.6216	Up
Ut20929	576	heat shock protein beta-1-like isoform 4	XP_003491574	Bombus impatiens	5e-119	0.89	0	110.67	16.7559	Up
Ut21435	606	small heat shock protein	AEH05930	Apis cerana cerana	2e-79	0.64	0.1911	1126.27	12.5249	Up
Ut21550	237	heat shock protein 83-like isoform 1	XP_001944761	Acyrthosiphon pisum	0.0007	1	0	16.4789	14.0083	Up
Ut24104	361	putative heat shock protein 70 HSP70 interacting protein	EHJ71842	Danaus plexippus	5e-12	0.4	0	5.9787	12.5456	Up
Ut24336	194	heat shock 70 kDa protein cognate 4-like, partial	XP_003248625	Acyrthosiphon pisum	2e-35	0.98	0	26.6269	14.7006	Up
Ut29115	315	10 kDa heat shock protein, mitochondrial	EGI60182	Acromyrmex echinatior	4e-52	0.76	0	243.446	17.8932	Up
Ut29653	199	heat shock protein 70	ABR18795	Trialeurodes vaporariorum	3e-17	1	0	43.0469	15.3936	Up
Ut2992	300	heat shock 70 kDa protein 12A-like	XP_001951229	Acyrthosiphon pisum	4e-62	0.97	0	5.676	12.4707	Up
Ut31500	534	heat shock 70 kDa protein cognate 4-like isoform 1	XP_001951386	Acyrthosiphon pisum	3e-121	0.99	19.1169	30.8021	0.6882	Up
Ut33216	699	heat shock 70 kDa protein cognate 3-like	XP_001606463	Nasonia vitripennis	4e-147	0.93	1.7635	335.245	7.5706	Up
Ut34057	813	heat shock protein 90	ABV55506	Microplitis mediator	3e-172	0.89	0	342.135	18.3842	Up
Ut34058	282	heat shock protein 90, partial	AFA35118	Cydia pomonella	3e-49	0.91	0	102.9	16.6509	Up
Ut34414	1629	heat shock protein 60	AEV89752	Schistocerca gregaria	0	0.81	0.0471	126.83	11.3949	Up
Ut34627	1050	heat shock 70 kDa protein 14	EFX75829	Danaus plexippus	1e-68	0.4	0	13.8608	13.7587	Up
Ut36486	120	heat shock protein 70 B2-like	XP_001949661	Acyrthosiphon pisum	1e-19	1	0	4.1148	12.0066	Up
Ut39415	237	heat shock protein 70 cognate	AFX84616	Frankliniella occidentalis	1e-41	0.92	0	2.2609	11.1427	Up
Ut42984	258	Hsp60 protein	CAB58441	Myzus persicae	9e-47	0.98	0	2.3311	11.1868	Up
Ut7520	924	chaperone protein dnaj	XP_001661333	Aedes aegypti	8e-99	0.63	19.1877	6.7261	-1.5123	Down
Ut9923	1002	dnaJ homolog subfamily B member 14-like	XP_001943005	Bactrocera dorsalis	4e-130	66	7.0213	4.9325	-0.5094	Down
Cytochrome P450
CL1364.Contig2	858	probable cytochrome P450 303a1-like	XP_001951093	Acyrthosiphon pisum	1e-153	0.96	10.4394	4.2959	-1.281	Down
CL1623.Contig1	1278	NADPH--cytochrome P450 reductase-like	XP_001945312	Acyrthosiphon pisum	0	0.97	50.1672	9.4643	-2.4062	Down
CL1721.Contig1	1524	Probable cytochrome P450 304a1	EFN65051	Camponotus floridanus	0	0.51	0	20.7258	14.3391	Up
CL1839.Contig1	803	probable cytochrome P450 6a13-like	XP_001948581	Acyrthosiphon pisum	7e-154	0.81	5.1016	0.2381	-4.4213	Down
CL1839.Contig2	837	probable cytochrome P450 6a14-like	XP_001943570	Acyrthosiphon pisum	2e-145	0.73	6.2877	0.3012	-4.3837	Down
CL1839.Contig3	600	cytochrome P450	ADL59603	Myzus persicae	2e-137	0.99	0	3.2611	11.6711	Up
CL1839.Contig5	239	probable cytochrome P450 6a13-like	XP_001946384	Acyrthosiphon pisum	5e-44	0.92	1.9005	0.7687	-1.3059	Down
CL2211.Contig1	285	cytochrome P450	ACE75339	Glyptapanteles indiensis	5e-36	0.63	0	3.6584	11.837	Up
CL2699.Contig1	1554	probable cytochrome P450 49a1-like	XP_001946744	Acyrthosiphon pisum	0	0.93	9.8753	4.3937	-1.1684	Down
CL3295.Contig3	1611	cytochrome P450 4C1-like	XP_001951034	Acyrthosiphon pisum	0	0.93	107.001	23.0884	-2.2124	Down
CL3439.Contig2	939	probable cytochrome P450 49a1-like	XP_001950592	Acyrthosiphon pisum	0	0.89	6.7422	3.8577	-0.8055	Down
CL3440.Contig1	1377	cytochrome P450 18a1-like	XP_001947923	Acyrthosiphon pisum	0	0.95	10.0069	4.4594	-1.1661	Down
CL3665.Contig1	1500	cytochrome P450 4g15-like	XP_003705403	Megachile rotundata	0	0.81	0	24.1229	14.5581	Up
CL4051.Contig2	1569	probable cytochrome P450 6a14-like	XP_001945100	Acyrthosiphon pisum	0	0.82	14.712	1.3186	-3.4799	Down
CL4213.Contig1	762	probable cytochrome P450 6a14-like isoform 2	XP_003400127	Bombus terrestris	3e-96	0.58	0	14.8273	13.856	Up
CL4499.Contig1	1380	cytochrome P450 315a1, mitochondrial-like	XP_001944183	Acyrthosiphon pisum	0	0.87	5.7075	3.1233	-0.8698	Down
CL4758.Contig1	696	cytochrome P450 6AS5	NP_001035324	Apis mellifera	1e-81	0.53	0	8.1699	12.9961	Up
CL4758.Contig2	351	cytochrome P450 6a2-like	XP_003694559	Apis florea	2e-32	0.47	0	3.5773	11.8047	Up
CL533.Contig1	1542	probable cytochrome P450 6a13-like	XP_001948934	Acyrthosiphon pisum	0	0.65	71.4893	2.016	-5.1482	Down
CL554.Contig3	1539	cytochrome P450 4C1-like	XP_001944092	Acyrthosiphon pisum	0	0.79	16.1034	6.1026	-1.3999	Down
CL554.Contig6	1530	cytochrome P450 4V2-like isoform 1	XP_001945545	Acyrthosiphon pisum	0	0.86	14.9597	4.4791	-1.7398	Down
CL5992.Contig1	564	cytochrome P450 4C1	XP_001602979	Nasonia vitripennis	2e-92	0.73	0	5.8357	12.5107	Up
CL6061.Contig1	1521	cytochrome P450 6a2-like isoform 2	XP_003248187	Acyrthosiphon pisum	0	0.91	2.9333	2.0937	-0.4865	Down
CL6400.Contig1	1527	Cytochrome P450 302a1, mitochondrial	EFN78521	Harpegnathos saltator	0	0.55	5.4334	4.3267	-0.3286	Down
CL7847.Contig2	1539	probable cytochrome P450 6a14-like	XP_001944599	Acyrthosiphon pisum	0	0.91	15.5305	3.0702	-2.3387	Down
CL878.Contig1	1527	cytochrome P450 4C1-like	XP_001952110	Acyrthosiphon pisum	0	0.86	21.6577	3.1228	-2.794	Down
Ut1003	1011	probable cytochrome P450 6a13-like	XP_001948934	Acyrthosiphon pisum	6e-170	0.8	228.21	5.2202	-5.4501	Down
Ut10506	753	probable cytochrome P450 301a1, mitochondrial-like	XP_001948959	Acyrthosiphon pisum	2e-160	0.94	22.4139	11.8402	-0.9207	Down
Ut11141	1566	cytochrome P450 6j1-like	XP_003243002	Acyrthosiphon pisum	0	0.91	8.7397	1.506	-2.5369	Down
Ut11238	1467	probable cytochrome P450 305a1-like	XP_001950295	Acyrthosiphon pisum	0	0.88	16.1859	2.1523	-2.9108	Down
Ut11293	558	cytochrome P450 307a1-like	XP_001945761	Acyrthosiphon pisum	3e-121	0.93	2.2797	2.8979	0.3462	Up
Ut12585	576	cytochrome P450 6a2-like	XP_001952450	Acyrthosiphon pisum	2e-93	0.79	4.7268	0.6037	-2.969	Down
Ut13063	418	cytochrome P450 4C1-like	XP_001943923	Acyrthosiphon pisum	2e-56	0.63	2.9563	0.7687	-1.9433	Down
Ut13950	514	probable cytochrome P450 6a13-like	XP_001948488	Acyrthosiphon pisum	2e-79	0.72	4.8712	0.6115	-2.9939	Down
Ut13972	1542	cytochrome P450 6a2-like	XP_001943981	Acyrthosiphon pisum	0	0.92	11.771	0.3949	-4.8976	Down
Ut141	1701	cytochrome P450 4g15-like	XP_001944205	Acyrthosiphon pisum	0	0.96	206.628	8.7579	-4.5603	Down
Ut15584	231	cytochrome P450 CYP6CY3-1, partial	AEZ51832	Aphis gossypii	2e-47	1	3.4554	0	-11.7546	Down
Ut16171	269	cytochrome P450 4C1-like	XP_003245384	Acyrthosiphon pisum	8e-33	0.81	3.1675	0	-11.6291	Down
Ut1764	144	cytochrome P450 4C1-like	XP_001944043	Acyrthosiphon pisum	7e-19	0.91	14.1013	5.4034	-1.3839	Down
Ut21052	383	cytochrome P450 6AS30	NP_001165999	Nasonia vitripennis	2e-46	0.63	0	3.7201	11.8611	Up
Ut21285	945	cytochrome P450 307a1	XP_001603435	Nasonia vitripennis	4e-118	0.58	0	4.5426	12.1493	Up
Ut21773	429	probable cytochrome P450 6a14-like	XP_003703231	Megachile rotundata	3e-29	0.51	0	7.2698	12.8277	Up
Ut22248	630	cytochrome P450 4C1	XP_001604044	Nasonia vitripennis	3e-84	0.61	0	6.1496	12.5863	Up
Ut2270	699	cytochrome P450 6k1-like	XP_001948421	Acyrthosiphon pisum	3e-137	0.82	207.015	9.9156	-4.3839	Down
Ut22886	972	cytochrome P450 4G44	NP_001165993	Nasonia vitripennis	4e-22	0.52	0	2.4618	11.2655	Up
Ut24187	675	LOW QUALITY PROTEIN: cytochrome P450 18a1-like	XP_003695147	Apis florea	4e-124	0.77	0	5.1111	12.3194	Up
Ut27971	411	Cytochrome P450 314a1, mitochondrial	EFN69019	Camponotus floridanus	5e-60	0.72	0	4.8267	12.2368	Up
Ut2880	828	cytochrome P450 CYP6BD10v2	AFU86445	Laodelphax striatella	1e-89	0.46	28.0774	12.0305	-1.2227	Down
Ut30953	639	Probable cytochrome P450 301a1, mitochondrial	EFN87619	Harpegnathos saltator	4e-131	0.88	0	8.3858	13.0337	Up
Ut31346	576	Probable cytochrome P450 6a20	EFN68370	Camponotus floridanus	4e-68	0.54	0	4.984	12.2831	Up
Ut31347	713	cytochrome P450 6a2-like	XP_003398646	Bombus terrestris	2e-82	0.54	0	7.9772	12.9617	Up
Ut33083	911	cytochrome P450 6BD2	NP_001165940	Nasonia vitripennis	3e-115	0.56	0	13.5053	13.7212	Up
Ut34799	1713	NADPH--cytochrome P450 reductase-like isoform 2	XP_003705535	Megachile rotundata	0	0.85	0	28.0099	14.7736	Up
Ut35202	588	cytochrome P450 9e2-like	XP_003697031	Apis florea	1e-53	0.47	0	6.0346	12.559	Up
Ut38029	447	probable cytochrome P450 301a1, mitochondrial-like isoform 1	XP_003484880	Bombus impatiens	9e-83	0.83	0	3.9473	11.9467	Up
Ut38966	336	cytochrome P450 4g15-like	XP_001944530	Acyrthosiphon pisum	9e-63	0.81	0	4.2148	12.0412	Up
Ut40422	234	cytochrome P450	CAQ57674	Nilaparvata lugens	1e-13	0.44	0	4.0023	11.9666	Up
Ut43512	224	cytochrome P450 4C1-like	XP_001951829	Acyrthosiphon pisum	5e-25	0.74	0	2.2995	11.1671	Up
Ut461	477	cytochrome P450 4C1-like	XP_001943923	Acyrthosiphon pisum	1e-99	0.95	2.5806	1.3184	-0.9689	Down
Ut4699	1293	cytochrome P450, putative	XP_002425642	Pediculus humanus corporis	1e-179	0.58	9.0597	3.8331	-1.241	Down
Ut5255	1287	cytochrome P450 306a1-like	XP_001947874	Acyrthosiphon pisum	0	0.91	5.377	2.0249	-1.409	Down
Ut7491	816	cytochrome P450 protein	NP_001156683	Acyrthosiphon pisum	1e-147	0.77	26.5643	3.4882	-2.9289	Down
Ut7586	1536	probable cytochrome P450 6a13-like	XP_001946428	Acyrthosiphon pisum	0	0.96	19.8598	2.7269	-2.8645	Down
Ut7661	813	cytochrome P450 6a2-like	XP_001951983	Acyrthosiphon pisum	6e-166	0.9	43.6726	2.947	-3.8894	Down
Ut8071	606	cytochrome P450 4C1-like	XP_003246356	Acyrthosiphon pisum	7e-130	0.89	4.7247	1.1466	-2.0429	Down
Ut8825	1563	cytochrome P450 6a2-like	XP_001947920	Acyrthosiphon pisum	0	0.75	49.9869	2.9427	-4.0863	Down
