# Supplementary material for: Ecological Adaption Analysis of the Cotton Aphid (Aphis gossypii) in Different Phenotypes by Transcriptome Comparison
Source: PLoS One. 2013 Dec 23;8(12):e83180. doi: 10.1371/journal.pone.0083180 (PMC3871566; doi:10.1371/journal.pone.0083180)
Supplement: Table S3 — The top 100 up-regulated MorphI transcripts, including gene name, FPKM, FDR, E-value, and Nr annotation result. (XLSX) [file pone.0083180.s005.xlsx]

## Sheet: Sheet1
Table S3. The top 100 up-regulated unigenes of MorphI.
GeneID	FPKM			FDR	Nr-Evalue	Nr-annotation
	MorphII	MorphI	log2(MorphI/MorphII)
U21436	0	3468.32	21.7258	0	--	--
CL889-2	0	1422.94	20.4404	0	--	--
U20135	0	1355.12	20.37	0	8e-72	ribosomal protein L23 [Bombyx mori] >gi|15081322|gb|AAK83857.1|AF395586_1 ribosomal protein L17/23 [Spodoptera frugiperda] >gi|49532860|dbj|BAD26665.1| Ribosomal protein L17/23 [Plutella xylostella] >gi|54609237|gb|AAV34834.1| ribosomal protein L23 [Bombyx mori] >gi|268306378|gb|ACY95310.1| ribosomal protein L23 [Manduca sexta] >gi|315115429|gb|ADT80687.1| ribosomal protein L23 [Euphydryas aurini…
U21297	0	1338.49	20.3522	0	1e-72	60S ribosomal protein L26 [Acromyrmex echinatior]
CL117-1	0	1301.67	20.3119	0	4e-70	ribosomal protein L32 isoform B [Lysiphlebus testaceipes]
U31574	0	1197.29	20.1913	0	7e-81	ribosomal protein S18 [Lysiphlebus testaceipes]
CL7268-1	0	1134	20.113	0	5e-100	ribosomal protein S7 [Lysiphlebus testaceipes]
U30097	0	1096.95	20.0651	0	--	--
U19774	0	1079.59	20.0421	0	0	ribosomal protein L4 [Lysiphlebus testaceipes]
CL122-1	0	1078.77	20.041	0	4e-99	ribosomal protein L9 [Lysiphlebus testaceipes]
CL1464-1	0	1070.06	20.0293	0	1e-98	ribosomal protein L17 isoform A [Lysiphlebus testaceipes]
U32514	0	1062.29	20.0187	0	5e-28	Flexible cuticle protein 12 [Acromyrmex echinatior]
CL2841-2	0	1049.4	20.0011	0	1e-35	fatty acid binding protein [Aphidius ervi]
U33033	0	1001.24	19.9334	0	--	--
CL606-1	0	943.403	19.8475	0	8e-91	60S ribosomal protein L11 [Acromyrmex echinatior]
U22436	0	918.138	19.8084	0	5e-64	ribosomal protein S30 [Lysiphlebus testaceipes]
CL2629-2	0	867.497	19.7265	0	8e-113	ribosomal protein S5 isoform A [Lysiphlebus testaceipes]
CL2505-1	0	839.367	19.6789	0	1e-58	ribosomal protein L31 isoform A [Lysiphlebus testaceipes]
CL1531-1	0	822.622	19.6499	0	1e-69	ribosomal protein S15A [Lysiphlebus testaceipes]
U21122	0	808.872	19.6256	0	1e-20	ribosomal protein L6 [Lysiphlebus testaceipes]
CL2973-1	0	804.769	19.6182	0	1e-70	ribosomal protein S12 [Lysiphlebus testaceipes]
U32226	0	795.325	19.6012	0	1e-102	carboxylesterase clade E, member 11 precursor [Nasonia vitripennis]
U33893	0	755.993	19.528	0	1e-68	ribosomal protein L40 [Lysiphlebus testaceipes]
U33041	0	740.185	19.4975	0	1e-43	ribosomal protein L37a [Lysiphlebus testaceipes]
U19750	0	725.515	19.4686	0	1e-14	ribosomal protein L8 [Lysiphlebus testaceipes]
U35039	0	705.137	19.4275	0	--	--
CL3995-2	0	703.681	19.4246	0	3e-71	ribosomal protein L14 [Lysiphlebus testaceipes]
CL482-1	0	681.521	19.3784	0	2e-06	PREDICTED: similar to cathepsin F-like cysteine protease [Tribolium castaneum]
U21473	0	641.79	19.2917	0	1e-64	60S ribosomal protein L21, putative [Pediculus humanus corporis] >gi|212507605|gb|EEB11498.1| 60S ribosomal protein L21, putative [Pediculus humanus corporis]
CL2712-1	0	638.151	19.2835	0	9e-46	60S ribosomal protein L37 [Acromyrmex echinatior]
U33491	0	627.385	19.259	0	1e-84	ribosomal protein L12 [Lysiphlebus testaceipes] >gi|62083513|gb|AAX62481.1| ribosomal protein L12 variant 1 [Lysiphlebus testaceipes]
CL5026-1	0	610.515	19.2197	0	1e-33	RecName: Full=60S ribosomal protein L38 >gi|62083499|gb|AAX62474.1| ribosomal protein L38 [Lysiphlebus testaceipes]
CL6403-3	0	584.806	19.1576	0	1e-66	PREDICTED: 60S ribosomal protein L27-like isoform 1 [Nasonia vitripennis] >gi|345492206|ref|XP_003426798.1| PREDICTED: 60S ribosomal protein L27-like isoform 2 [Nasonia vitripennis]
CL552-2	0	560.385	19.0961	0	1e-77	ribosomal protein S14 [Lysiphlebus testaceipes]
U21764	0	549.826	19.0686	0	--	--
U26797	0	548.121	19.0641	0	--	--
CL218-1	0	514.277	18.9722	0	5e-09	AAEL014517-PA [Aedes aegypti]
U21190	0	491.014	18.9054	0	3e-60	ribosomal protein S25 [Lysiphlebus testaceipes]
U32136	0	488.289	18.8974	0	1e-81	BVpp17b protein [Chelonus inanitus]
U31492	0	474.975	18.8575	0	--	--
CL1149-2	0	463.228	18.8214	0	1e-101	ribosomal protein S9 [Lysiphlebus testaceipes] >gi|62083483|gb|AAX62466.1| ribosomal protein S9 variant 1 [Lysiphlebus testaceipes]
CL4662-2	0	456.391	18.7999	0	7e-61	ribosomal protein S26 [Lysiphlebus testaceipes]
U31337	0	446.882	18.7695	0	1e-78	ribosomal protein S11 [Lysiphlebus testaceipes]
CL2053-1	0	426.483	18.7021	0	7e-58	AGAP001274-PA [Anopheles gambiae str. PEST] >gi|55234069|gb|EAA01741.2| AGAP001274-PA [Anopheles gambiae str. PEST]
CL2712-2	0	423.037	18.6904	0	1e-46	ribosomal protein L37 [Lysiphlebus testaceipes]
CL5420-2	0	410.621	18.6474	0	1e-39	PREDICTED: 60S ribosomal protein L35a-like [Bombus terrestris]
U21527	0	391.885	18.5801	0	--	--
U33535	0	382.544	18.5453	0	3e-49	PREDICTED: myosin regulatory light chain 2-like [Bombus terrestris]
U33874	0	379.796	18.5349	0	4e-16	cytoplasmic actin [Spirometra erinaceieuropaei]
U21118	0	378.17	18.5287	0	4e-07	putative lipocalin-like protein [Sitobion avenae]
CL3698-3	0	377.675	18.5268	0	1e-22	ribosomal protein L39 [Danaus plexippus]
U30578	0	374.382	18.5141	0	--	--
CL5420-1	0	370.514	18.4992	0	1e-39	PREDICTED: 60S ribosomal protein L35a-like [Bombus terrestris]
CL4887-1	0	360.499	18.4596	0	1e-73	PREDICTED: 40S ribosomal protein S13 [Apis mellifera] >gi|340713552|ref|XP_003395306.1| PREDICTED: 40S ribosomal protein S13-like [Bombus terrestris] >gi|350409453|ref|XP_003488743.1| PREDICTED: 40S ribosomal protein S13-like [Bombus impatiens] >gi|380011574|ref|XP_003689876.1| PREDICTED: 40S ribosomal protein S13-like [Apis florea] >gi|383849461|ref|XP_003700363.1| PREDICTED: 40S ribosomal prote…
U21385	0	343.38	18.3894	0	1e-31	PREDICTED: endocuticle structural glycoprotein SgAbd-2 [Nasonia vitripennis]
U34057	0	342.135	18.3842	0	5e-166	heat shock protein 90 [Microplitis mediator]
U21796	0	341.689	18.3823	0	9e-95	hypothetical protein EAI_11018 [Harpegnathos saltator]
U30102	0	334.245	18.3505	0	--	--
CL552-1	0	332.771	18.3442	0	2e-77	ribosomal protein S14 [Lysiphlebus testaceipes]
U19834	0	331.974	18.3407	0	1e-19	Nuclear protein 1 [Camponotus floridanus]
CL7763-1	0	331.891	18.3404	7.8178e-265	--	--
CL6403-2	0	320.502	18.29	3.4424e-234	1e-26	ribosomal protein L27 [Lysiphlebus testaceipes]
U21742	0	317.034	18.2743	1.2766e-299	4e-06	cytoplasmic actin [Spirometra erinaceieuropaei]
CL6270-2	0	313.527	18.2582	3.1607e-277	3e-36	PREDICTED: 40S ribosomal protein S19a-like [Nasonia vitripennis]
U22520	0	312.953	18.2556	0	6e-81	PREDICTED: hypothetical protein LOC100646488 [Bombus terrestris]
U24346	0	304.467	18.2159	3.7147e-233	5e-06	hypothetical protein [Tityus discrepans]
U21407	0	296.238	18.1764	0	3e-92	PREDICTED: peroxiredoxin 1-like [Nasonia vitripennis]
U26696	0	291.876	18.155	0	5e-51	cytochrome oxidase subunit I, partial (mitochondrion) [Aulacorthum solani]
U30746	0	290.982	18.1506	2.7412e-216	2e-22	hypothetical protein AND_22725 [Anopheles darlingi]
U29053	0	288.024	18.1358	0	6e-101	cytochrome c oxidase subunit II [Aphidius gifuensis]
U34434	0	286.827	18.1298	0	6e-79	PREDICTED: peptidyl-prolyl cis-trans isomerase-like [Nasonia vitripennis]
U33892	0	286.629	18.1288	0	2e-34	ubiquitin/40S ribosomal protein S27a fusion protein [Argas monolakensis]
U20117	0	276.547	18.0772	0	8e-15	PREDICTED: troponin I-like isoform 3 [Bombus impatiens]
CL4580-1	0	270.611	18.0459	0	9e-170	Phosphate carrier protein, mitochondrial [Camponotus floridanus]
U24347	0	266.968	18.0263	0	--	--
U20615	0	263.346	18.0066	0	8e-66	cytochrome oxidase subunit I [Diaeretiella rapae] >gi|28630744|gb|AAO45537.1| cytochrome oxidase subunit I [Diaeretiella rapae] >gi|28630746|gb|AAO45538.1| cytochrome oxidase subunit I [Diaeretiella rapae] >gi|28630748|gb|AAO45539.1| cytochrome oxidase subunit I [Diaeretiella rapae] >gi|28630750|gb|AAO45540.1| cytochrome oxidase subunit I [Diaeretiella rapae] >gi|28630752|gb|AAO45541.1| cytochrom…
U34451	0	257.648	17.975	1.2237e-279	1e-07	Protein disulfide-isomerase A3 [Acromyrmex echinatior]
U20857	0	249.308	17.9276	1.0053e-301	1e-22	ribosomal protein L39 [Danaus plexippus]
U32132	0	245.645	17.9062	0	2e-123	cytochrome c oxidase subunit III [Aphidius gifuensis]
U30279	0	244.933	17.902	1.8631e-263	--	--
U29115	0	243.446	17.8932	0	1e-40	10 kDa heat shock protein, mitochondrial [Acromyrmex echinatior]
CL3127-1	0	239.058	17.867	5.7867e-300	--	--
CL6858-1	0	233.3	17.8318	0	4e-08	hypothetical protein CLF_100574 [Clonorchis sinensis]
U33213	0	232.94	17.8296	0	1e-93	Elongation factor 1-beta&apos; [Harpegnathos saltator]
CL2841-1	0	230.754	17.816	0	8e-25	fatty acid binding protein [Aphidius ervi]
U32083	0	226.719	17.7905	0	3e-63	Myosin light chain alkali [Camponotus floridanus]
CL482-3	0	226.708	17.7905	1.1708e-196	--	--
U33905	0	224.804	17.7783	0	7e-76	putative enolase [Aphidius ervi]
CL250-1	0	224.048	17.7734	0	0	PREDICTED: calreticulin-like [Megachile rotundata]
CL6265-1	0	222.184	17.7614	0	5e-68	PREDICTED: hypothetical protein LOC100122340 [Nasonia vitripennis]
U19885	0	218.192	17.7352	0	1e-124	alpha-tubulin, partial [Teleopsis dalmanni]
CL1105-1	0	217.008	17.7274	0	1e-56	PREDICTED: antitrypsin-like [Apis florea]
CL859-1	0	215.643	17.7183	0	0	PREDICTED: heat shock 70 kDa protein cognate 3-like [Nasonia vitripennis]
U33917	0	214.598	17.7113	0	3e-80	PREDICTED: translationally-controlled tumor protein homolog [Nasonia vitripennis]
U28936	0	212.308	17.6958	3.3059e-224	1e-27	RecName: Full=40S ribosomal protein S29 >gi|62083331|gb|AAX62390.1| ribosomal protein S29 isoform B [Lysiphlebus testaceipes]
U19649	0	207.112	17.6601	4.3363e-210	--	--
CL4038-2	0	206.426	17.6553	0	3e-79	PREDICTED: calmodulin-like [Metaseiulus occidentalis]
CL859-4	0	205.713	17.6503	0	1e-61	PREDICTED: heat shock protein 68-like [Nasonia vitripennis]
U21429	0	204.459	17.6415	0	7e-39	PREDICTED: uncharacterized protein LOC100865869 [Apis florea]
CL36-2	0	198.361	17.5978	0	9e-57	ribosomal protein L36 [Lysiphlebus testaceipes]
